# Supplementary material
Source: Research Square preprint supplement (doi:10.21203/rs.3.rs-8691276/v1)
Supplement: Supplementary file 1 [file 3db2a2c07a498753a21a53d1.docx]

**Mental Distress and Associated Factors Among Undergraduate Students at Somali National University.**

**Section A: Background information**

This section of the questionnaire evaluates your socioeconomic and demographic information; after reading the questions below, please provide appropriate answers on your socioeconomic as well as demographic information.

1. Age in year
2. ≤ 20
3. 21–24
4. ≥25

2. Gender

a) male

b) female

3. Marital status

a) Single

b) Married

c)divorced

4. who do you live with

a) family

b) alone

c)relative

5.Place of residence ______________

1. College/faculty/school attending or studying
2. Medicine and Surgery
3. Public Health
4. Islamic Studies nd Sharia Law
5. Languages
6. Social sciences and humanities

7. Year of study

a) 1st year student

b) 2nd year student

c) 3rd year student

d) 4th year student

e)5th year student

f)6th year student

8. Interest on the subject of study

a) Yes

b) No

9. Receive monthly income or pocket money

a) Yes

b) No

10. If yes for question 9, how much is your Monthly income (in US dollars)?

a) ≤100

b) >100

11. Do you encounter financial distress?

a) Yes

b) No

12. Does any one in your family suffered or suffering from mental illness problems?

a) Yes

b) No

13. If yes to question 12, how close are they related to you?

a) Parent(s)

b) Siblings

c) Close relatives

d) Distant relatives

**Section B Mental Distress Self-Reporting Questionnaire**

The following questions are about specific pains and problems that you may have had in the last 30 days. Please click the 'Yes' box if you have experienced this symptom in the recent 30 days. If you haven't had this symptom in the recent 30 days, please click the 'No' option.

| 1 | Do you often have headaches? | **yes** | **no** |
| --- | --- | --- | --- |
| 2 | Is your appetite being poor? | **yes** | **no** |
| 3 | Do you sleep badly | **yes** | **no** |
| 4 | Are you easily frightened | **yes** | **no** |
| 5 | Do your hands shake | **yes** | **no** |
| 6 | Do you feel nervous, tense or worried? | **yes** | **no** |
| 7 | Is your digestion being poor | **yes** | **no** |
| 8 | Do you have trouble thinking clearly? | **yes** | **no** |
| 9 | Do you feel unhappy? | **yes** | **no** |
| 10 | Do you cry more than usual? | **yes** | **no** |
| 11 | Do you find it difficult to enjoy your daily activities? | **yes** | **no** |
| 12 | Do you find it difficult to make decisions? | **yes** | **no** |
| 13 | Is your daily routine suffering? | **yes** | **no** |
| 14 | Are you unable to play a useful part in life? | **yes** | **no** |
| 15 | Have you lost interest in things? | **yes** | **no** |
| 16 | Do you feel that you are a worthless person? | **yes** | **no** |
| 17 | Has the thought of ending your life been on your mind? | **yes** | **no** |
| 18 | Do you feel tired all the time? | **yes** | **no** |
| 19 | Do you have uncomfortable feeling in the stomach? | **yes** | **no** |
| 20 | Are you easily tired? | **yes** | **no** |

**Section c substance use**

The following questions focus on alcohol, Khat chewing habits, cigarette smoking, shisha smoking, and the usage of other medications such as sedatives. As a result, you are kindly invited to provide an honest response about your personal behavior about the usage of these substances.

Please check the 'yes' box if you have used the indicated substance and the 'no' box if you have not used it in your life or in the last 1 month as prescribed. 0= No, 1= Yes

| 1. Have you ever used alcohol drinks (like beer or any other alcohol drinks) in your life time? | **yes** | **no** |
| --- | --- | --- |
| 1. Have you used any kind of alcohol drinks in the last one month? | **yes** | **no** |
| 1. Have you ever used Tobacco products such as cigarette smoking, shisha any other tobacco products in your life time? | **yes** | **no** |
| 1. Have you used any kind of tobacco product in the last one month? | **yes** | **no** |
| 1. Have you ever used other substances such as Khat, cannabis or others in your life time? | **yes** | **no** |
| 1. Have you used any other substances such as Khat, cannabis or others in the last one month? | **yes** | **no** |
| 1. Have you ever used sleeping medicines or sedatives in your life time? | **yes** | **no** |
| 1. Have you used sleeping medicines or sedatives in the last one month? | **yes** | **no** |
| 1. Have you ever injected drugs? | **yes** | **no** |
| 1. If Yes in Q9 above, have you injected in the past one month? | **yes** | **no** |

**Section D. Academic problems**

This part evaluates academic problems that students face/experience in the course of their studies. The answer is provided by “Yes” or “No”. Please tick the ‘yes box’ if you have experienced and ‘no box’ if you don’t in the last academic year.

| 1. Increase class work load | **yes** | **no** |
| --- | --- | --- |
| 1. Decrease grade than anticipated | **yes** | **no** |
| 1. Missed too many class | **yes** | **no** |
| 1. Serious arguments with instructors | **yes** | **no** |
| 1. lack of vacations /break | **yes** | **no** |

**Section E Multidimensional Scale of Perceived Social Support**

This section evaluates the social assistance you have received from family, friends, and significant others. Each item is graded. Please circle the appropriate number

**Circle the “1” if you Very Strongly Disagree**

**Circle the “2” if you Strongly Disagree**

**Circle the “3” if you Mildly Disagree**

**Circle the “4” if you are Neutral**

**Circle the “5” if you Mildly Agree**

**Circle the “6” if you Strongly Agree**

**Circle the “7” if you Very Strongly Agree**

| 1. There is a special person who is around when I am in need. | 1 | 2 | 3 | 4 | 5 | 6 | 7 |
| --- | --- | --- | --- | --- | --- | --- | --- |
| 1. There is a special person with whom I can share my joys and sorrows. | 1 | 2 | 3 | 4 | 5 | 6 | 7 |
| 1. My family really tries to help me. | 1 | 2 | 3 | 4 | 5 | 6 | 7 |
| 1. I get the emotional help and support I need from my family. | 1 | 2 | 3 | 4 | 5 | 6 | 7 |
| 1. I have a special person who is a real source of comfort to me. | 1 | 2 | 3 | 4 | 5 | 6 | 7 |
| 1. My friends really try to help me. | 1 | 2 | 3 | 4 | 5 | 6 | 7 |
| 1. I can count on my friends when things go wrong. | 1 | 2 | 3 | 4 | 5 | 6 | 7 |
| 1. I can talk about my problems with my family. | 1 | 2 | 3 | 4 | 5 | 6 | 7 |
| 1. I have friends with whom I can share my joys and sorrows. | 1 | 2 | 3 | 4 | 5 | 6 | 7 |
| 1. There is a special person in my life who cares about my feelings. | 1 | 2 | 3 | 4 | 5 | 6 | 7 |
| 1. My family is willing to help me make decisions. | 1 | 2 | 3 | 4 | 5 | 6 | 7 |
| 1. I can talk about my problems with my friends. | 1 | 2 | 3 | 4 | 5 | 6 | 7 |
