# Supplementary material
Source: Research Square preprint supplement (doi:10.21203/rs.3.rs-8691276/v1)
Supplement: Supplementary file 2 [file 8e710265bc2138d0b1f838bd.docx]

**PARTICIPANT INFORMATION SHEET and CONSENT FORM**

**Title of study**: **Mental Distress Prevalence and Predictors Among Undergraduates at Somali National University: Institutional based study**.

**INTRODUCTION**

Mental distress among undergraduate students is a growing concern in today's society, as the transition to college life can be challenging and accompanied by new stressors. Factors contributing to mental distress include academic pressure, social aspects, financial burden, and inadequate support systems. The pressure to excel academically, adapting to a new social environment, financial strain, and lack of adequate support can lead to anxiety, self-doubt, and fear of failure. The financial burden of higher education can also exacerbate mental distress, as students struggle to manage their finances and worry about their future financial stability. The lack of adequate support systems can further worsen mental distress, as many universities and colleges have limited resources and services to address mental health needs. Mental distress can negatively impact academic performance, relationships, and overall quality of life, leading to a decline in grades and feelings of academic failure. Addressing these factors is crucial to create a healthier and more supportive environment for undergraduate students, promoting their overall well-being and success.

**WHAT IS THE PURPOSE OF THIS STUDY?**

The aim of this research study is to explore the prevalence of mental distress and identify the factors associated with it among undergraduate students at Somali National University. By understanding the mental health challenges faced by students, we hope to provide insights that can inform strategies to improve student well-being and promote a supportive academic environment.

**WHO CAN PARTICIPATE IN THIS STUDY?**

This study seeks to understand the prevalence of mental distress among Somali university students in order to develop a plan of action to address it. Participants in this study are regular undergraduate students at the Somali National University's KM4 campus. As a consequence, you are selected at random from a list of university students.

**WHAT DOES THIS STUDY INVOLVE?**

To participate in this study, you will be asked to complete a Google Form questionnaire that you will receive via WhatsApp. The questionnaire consists of a four-part structured self-administered questionnaire.

The first section inquiries about information about students' socio-demographic traits. The self-reporting questionnaire is the second part of the questionnaire. In the third component of the questionnaire, students' behavioural characteristics are collected, including history of substance abuse (including smoking cigarettes, smoking Shisha (hookah), and using sedatives). The fourth component of the questionnaire analyses academic characteristics, while the fifth section uses a 12-item Multidimensional Measure of Perceived Social Support to assess social support. Your responses will remain confidential and anonymous. The questionnaire should require approximately 30 minutes of completion.

**WILL THIS STUDY HELP?**

The purpose of this study is to better understand the frequency of mental distress among Somali university students and to develop a plan to address it. and by participating in this study, you will help to enhance understanding of mental distress among undergraduate students, which could lead to better mental health services and support on campus.

**DO I HAVE TO PARTICIPATE IN THIS STUDY?**

No, the decision is completely up to you. Your participation in this study is entirely voluntary. Whether you take part or not is for you to decide, and you have at least 24 hours to think about it.

If you do agree to take part, but then decide that you no longer want to, you can withdraw any point during the interview without giving us a reason. If you decide that you want to withdraw after the questionnaire has been completed, this will be completely fine, as long as we have not yet analysed the data. Once this is done, it will be difficult for us to remove any contributions that you have personally made. We would expect this to happen by around 48 hours after the questionnaire. You can tell us if you want to withdraw your data using the contact details provided below.

**CONFIDENTIALITY**

Any information that you share during the questionairre will be confidential. This means that it will not be possible for anyone outside the research team to know what you have said regarding the topics that are discussed. The research team will use the information from the interview for intervention development, research and advocacy purposes, but anything that you contributed will be anonymised.

**WHAT WILL THE STUDY COST ME?**

The study will cost you nothing in terms of money, but it will involve your time, as outlined above.

**PROVIDING ANSWERS TO YOUR QUESTIONS**

If you want to know more about the study you may ask us now and you will also be able to communicate later with the Principal Investigator of this study, Dr. ikram, by telephone or email:

Ikramabdirizak11@gmail.com

**Conclusion**:

Your participation in this study is greatly appreciated. By completing the questionnaire, you will contribute to a better understanding of mental distress among undergraduate students at Somali National University. Your experiences and insights are invaluable in shaping strategies and support services to improve student well-being. Thank you for considering taking part in this important research study.

CONSENT FORM

**Title of Study:** Mental Distress and Associated Factors Among Undergraduate Students at Somali National University.

To take part in this study and to allow the use and disclosure of your information for the purposes of this study, you must sign and date this page.

**By signing this page, I confirm the following:**

| I confirm that I have read and understood the information sheet. |  |
| --- | --- |
| I have read the information sheet and have had time to think about whether or not I want to participate in the study. |  |
| I understand that by taking part in this study my identity will be kept confidential. |  |
| I understand that by taking part in this study the responses I provide will be used for research purposes, including publication. Any data that is used will be anonymous |  |
| All my questions about the study or this form were answered to my satisfaction. If I did not understand any of the words in this document, the researcher explained them to me so that their meaning was clear. |  |
| I voluntarily agree to take part in the study, to follow the study procedures and to provide necessary information to the researcher, as requested. |  |
| I understand that the information I share will be accessed by the researchers only. |  |
| I may freely choose to stop being a part of this study in accordance with the information provided on the information sheet. |  |
| I agree to the interview being audio taped |  |
| I have received a copy of this document. |  |
| **I agree to take part in the above titled study.** |  |

| Signature of participants |  | Signature of investigator |  | Signature of witness |
| --- | --- | --- | --- | --- |
|  |  |  |  |  |
| Participant’s name |  | Investigator’s name |  | Witness’ name |
|  |  |  |  |  |
| Date |  | Date |  | Date |
